# Supplementary material for: Genome-wide comparison of the transcriptomes of highly enriched normal and chronic myeloid leukemia stem and progenitor cell populations
Source: PubMed Central journal article supplement (PMC3742832; doi:10.18632/oncotarget.990), 2013-05-06
Supplement: oncotarget-04-715-s001.pdf [file oncotarget-04-715-s001.pdf]

**Supplementary Table 1. Chronic Phase CML and Normal Donor Bone Marrow Samples**

| Sample ID | Diagnosis         | Age | % <i>BCR-ABL</i> Positive Cells                                  |                                                   |
|-----------|-------------------|-----|------------------------------------------------------------------|---------------------------------------------------|
|           |                   |     | Stem (CD34 <sup>+</sup> CD38 <sup>-</sup> ALDH <sup>high</sup> ) | Progenitor (CD34 <sup>+</sup> CD38 <sup>+</sup> ) |
| NL1       | Normal            | 42  | NA                                                               | NA                                                |
| NL2       | Normal            | 56  | NA                                                               | NA                                                |
| NL3       | Normal            | 60  | NA                                                               | NA                                                |
| NL4       | Normal            | 57  | NA                                                               | NA                                                |
| NL5       | Normal            | 60  | NA                                                               | NA                                                |
| CML1      | Chronic Phase CML | 41  | 100.0%                                                           | 98.5%                                             |
| CML2      | Chronic Phase CML | 28  | 98.5%                                                            | 98.0%                                             |
| CML3      | Chronic Phase CML | 55  | 99.5%                                                            | 98.5%                                             |
| CML4      | Chronic Phase CML | 50  | 32.0%                                                            | 96.0%                                             |
| CML5      | Chronic Phase CML | 69  | 80.5%                                                            | 99.0%                                             |

Stem and progenitor cells from bone marrow samples of 5 normal donors and 5 CP CML patients were isolated, and the presence of *BCR-ABL*<sup>+</sup> leukemic cells in CP CML samples was confirmed by FISH on cytospin preparations, as described in "Methods".

NA indicates not applicable.

**Supplementary Table 2A. Upregulated Gene Sets in CML Compared to Normal Stem Cells**

| Category*                | GO ID                                  | GO/KEGG Term                                                                                   | P        | Q †      | Transcript Clusters‡ |
|--------------------------|----------------------------------------|------------------------------------------------------------------------------------------------|----------|----------|----------------------|
| Cell Cycle/Proliferation | GO:0007049                             | cell cycle                                                                                     | <1E-15   | <1E-15   | 511                  |
|                          | GO:0051301                             | cell division                                                                                  | <1E-15   | <1E-15   | 276                  |
|                          | GO:0007067                             | mitosis                                                                                        | <1E-15   | <1E-15   | 220                  |
|                          | GO:0006260                             | DNA replication                                                                                | <1E-15   | 2.00E-15 | 170                  |
|                          | KEGG                                   | DNA replication reactome                                                                       | 1.24E-12 | 7.42E-11 | 42                   |
|                          | GO:0007059                             | chromosome segregation                                                                         | 3.47E-13 | 1.40E-10 | 57                   |
|                          | GO:0000775                             | chromosome, centromeric region                                                                 | 7.25E-12 | 2.39E-09 | 62                   |
|                          | KEGG                                   | cell cycle KEGG                                                                                | 1.99E-08 | 2.98E-07 | 89                   |
|                          | GO:0000777                             | condensed chromosome kinetochore                                                               | 9.66E-09 | 1.84E-06 | 67                   |
|                          | GO:0004386                             | helicase activity                                                                              | 2.66E-08 | 4.19E-06 | 115                  |
|                          | GO:0051436                             | negative regulation of ubiquitin-protein ligase activity involved in mitotic cell cycle        | 3.19E-08 | 4.83E-06 | 65                   |
|                          | GO:0031145                             | anaphase-promoting complex-dependent proteasomal ubiquitin-dependent protein catabolic process | 3.59E-08 | 5.22E-06 | 66                   |
|                          | GO:0000922                             | spindle pole                                                                                   | 5.08E-08 | 6.83E-06 | 56                   |
|                          | GO:0017111                             | nucleoside-triphosphatase activity                                                             | 1.81E-07 | 2.12E-05 | 63                   |
|                          | GO:0051437                             | positive regulation of ubiquitin-protein ligase activity involved in mitotic cell cycle        | 3.66E-07 | 3.80E-05 | 67                   |
|                          | KEGG                                   | G1 to S cell cycle reactome                                                                    | 5.53E-06 | 5.53E-05 | 72                   |
|                          | GO:0006270                             | DNA-dependent DNA replication initiation                                                       | 6.04E-07 | 6.08E-05 | 16                   |
|                          | GO:0005813                             | centrosome                                                                                     | 5.48E-06 | 4.42E-04 | 138                  |
|                          | GO:0004003                             | ATP-dependent DNA helicase activity                                                            | 6.26E-06 | 4.83E-04 | 25                   |
|                          | GO:0000793                             | condensed chromosome                                                                           | 6.64E-06 | 5.02E-04 | 19                   |
|                          | GO:0005814                             | centriole                                                                                      | 1.44E-05 | 1.00E-03 | 42                   |
|                          | GO:0005876                             | spindle microtubule                                                                            | 1.64E-05 | 1.12E-03 | 31                   |
|                          | GO:0008026                             | ATP-dependent helicase activity                                                                | 2.69E-05 | 1.74E-03 | 64                   |
|                          | GO:0000723                             | telomere maintenance                                                                           | 3.13E-05 | 1.96E-03 | 23                   |
|                          | GO:0005663                             | DNA replication factor C complex                                                               | 4.66E-05 | 2.60E-03 | 6                    |
|                          | GO:0008094                             | DNA-dependent ATPase activity                                                                  | 5.28E-05 | 2.86E-03 | 34                   |
|                          | GO:0005819                             | spindle                                                                                        | 5.94E-05 | 3.13E-03 | 101                  |
|                          | GO:0000796                             | condensin complex                                                                              | 7.44E-05 | 3.81E-03 | 6                    |
|                          | GO:0007080                             | mitotic metaphase plate congression                                                            | 9.13E-05 | 4.54E-03 | 12                   |
|                          | GO:0003678                             | DNA helicase activity                                                                          | 9.71E-05 | 4.68E-03 | 20                   |
| GO:0016568               | chromatin modification                 | 1.20E-04                                                                                       | 5.58E-03 | 217      |                      |
| GO:0000070               | mitotic sister chromatid segregation   | 1.51E-04                                                                                       | 6.62E-03 | 12       |                      |
| GO:0003689               | DNA clamp loader activity              | 1.76E-04                                                                                       | 7.51E-03 | 5        |                      |
| GO:0007093               | mitotic cell cycle checkpoint          | 2.12E-04                                                                                       | 8.64E-03 | 14       |                      |
| GO:0000940               | condensed chromosome outer kinetochore | 2.38E-04                                                                                       | 9.53E-03 | 10       |                      |
| GO:0006275               | regulation of DNA replication          | 2.39E-04                                                                                       | 9.53E-03 | 9        |                      |
| GO:0000075               | cell cycle checkpoint                  | 2.50E-04                                                                                       | 9.85E-03 | 17       |                      |
| mRNA Processing          | GO:0008380                             | RNA splicing                                                                                   | 2.90E-14 | 1.33E-11 | 281                  |
|                          | KEGG                                   | mRNA processing reactome                                                                       | 9.68E-10 | 2.90E-08 | 103                  |
|                          | GO:0005681                             | spliceosomal complex                                                                           | 7.47E-09 | 1.51E-06 | 127                  |
|                          | GO:0006397                             | mRNA processing                                                                                | 1.07E-07 | 1.34E-05 | 247                  |
|                          | KEGG                                   | RNA transcription reactome                                                                     | 2.46E-06 | 2.96E-05 | 38                   |
|                          | GO:0006406                             | mRNA export from nucleus                                                                       | 3.52E-06 | 3.12E-04 | 36                   |
| Translation              | GO:0000184                             | nuclear-transcribed mRNA catabolic process, nonsense-mediated decay                            | 6.60E-05 | 3.42E-03 | 36                   |
|                          | GO:0005730                             | nucleolus                                                                                      | 1.09E-11 | 3.30E-09 | 776                  |
|                          | GO:0006364                             | rRNA processing                                                                                | 1.17E-08 | 2.02E-06 | 94                   |
|                          | GO:0006412                             | translation                                                                                    | 4.66E-08 | 6.50E-06 | 212                  |
|                          | GO:0005840                             | ribosome                                                                                       | 8.66E-08 | 1.12E-05 | 178                  |
|                          | GO:0008033                             | tRNA processing                                                                                | 1.05E-06 | 1.03E-04 | 64                   |
|                          | GO:0005761                             | mitochondrial ribosome                                                                         | 2.52E-06 | 2.34E-04 | 19                   |

**Supplementary Table 2A (con't). Upregulated Gene Sets in CML Compared to Normal Stem Cells**

| Category*                   | GO ID      | GO/KEGG Term                                               | P        | Q†       | Transcript Clusters‡ |
|-----------------------------|------------|------------------------------------------------------------|----------|----------|----------------------|
|                             | GO:0003735 | structural constituent of ribosome                         | 8.09E-05 | 4.08E-03 | 153                  |
| <b>DNA Repair</b>           | GO:0006281 | DNA repair                                                 | 2.19E-11 | 5.30E-09 | 216                  |
|                             | GO:0006297 | nucleotide-excision repair, DNA gap filling                | 1.03E-05 | 7.31E-04 | 17                   |
|                             | GO:0006302 | double-strand break repair                                 | 3.27E-05 | 1.98E-03 | 40                   |
|                             | GO:0000731 | DNA synthesis involved in DNA repair                       | 3.50E-05 | 2.08E-03 | 10                   |
|                             | GO:0006310 | DNA recombination                                          | 5.86E-05 | 3.13E-03 | 64                   |
|                             | GO:0003684 | damaged DNA binding                                        | 1.93E-04 | 8.13E-03 | 47                   |
| <b>Oxidative Metabolism</b> | GO:0005743 | mitochondrial inner membrane                               | 6.09E-10 | 1.30E-07 | 269                  |
|                             | KEGG       | electron transport chain                                   | 1.60E-08 | 2.98E-07 | 81                   |
|                             | GO:0005759 | mitochondrial matrix                                       | 3.12E-06 | 2.83E-04 | 160                  |
|                             | GO:0006120 | mitochondrial electron transport, NADH to ubiquinone       | 3.93E-06 | 3.40E-04 | 44                   |
|                             | GO:0022900 | electron transport chain                                   | 4.54E-06 | 3.83E-04 | 100                  |
|                             | GO:0070469 | respiratory chain                                          | 8.54E-06 | 6.33E-04 | 51                   |
|                             | GO:0005747 | mitochondrial respiratory chain complex I                  | 1.85E-05 | 1.24E-03 | 49                   |
|                             | GO:0008137 | NADH dehydrogenase (ubiquinone) activity                   | 3.27E-05 | 1.98E-03 | 47                   |
|                             | GO:0006099 | tricarboxylic acid cycle                                   | 5.02E-05 | 2.76E-03 | 23                   |
|                             | KEGG       | Krebs-TCA cycle                                            | 7.44E-04 | 4.96E-03 | 30                   |
|                             | GO:0015992 | proton transport                                           | 1.45E-04 | 6.41E-03 | 40                   |
| <b>Protein Processing</b>   | GO:0006457 | protein folding                                            | 1.06E-08 | 1.93E-06 | 160                  |
|                             | GO:0051603 | proteolysis involved in cellular protein catabolic process | 3.37E-07 | 3.60E-05 | 28                   |
|                             | GO:0004298 | threonine-type endopeptidase activity                      | 5.43E-06 | 4.42E-04 | 20                   |
|                             | GO:0003755 | peptidyl-prolyl cis-trans isomerase activity               | 6.00E-06 | 4.73E-04 | 38                   |
|                             | GO:0015031 | protein transport                                          | 1.02E-05 | 7.31E-04 | 413                  |
|                             | GO:0000502 | proteasome complex                                         | 9.80E-05 | 4.68E-03 | 56                   |
|                             | GO:0006461 | protein complex assembly                                   | 1.28E-04 | 5.90E-03 | 110                  |
|                             | GO:0030117 | membrane coat                                              | 1.41E-04 | 6.30E-03 | 26                   |
|                             | KEGG       | proteasome degradation                                     | 1.26E-03 | 7.54E-03 | 56                   |
| <b>Immune Response</b>      | GO:0016446 | somatic hypermutation of immunoglobulin genes              | 4.61E-05 | 2.60E-03 | 8                    |
| <b>Metabolic Processes</b>  | KEGG       | cholesterol biosynthesis                                   | 2.23E-04 | 1.67E-03 | 15                   |
|                             | KEGG       | heme biosynthesis                                          | 2.03E-04 | 1.67E-03 | 8                    |
|                             | GO:0051287 | NAD binding                                                | 9.79E-05 | 4.68E-03 | 37                   |
|                             | GO:0044237 | cellular metabolic process                                 | 1.36E-04 | 6.18E-03 | 19                   |
|                             | GO:0006783 | heme biosynthetic process                                  | 2.01E-04 | 8.29E-03 | 17                   |
| <b>Multiple</b>             | GO:0005634 | nucleus                                                    | <1E-15   | <1E-15   | 4938                 |
|                             | GO:0005739 | mitochondrion                                              | <1E-15   | <1E-15   | 1295                 |
|                             | GO:0005654 | nucleoplasm                                                | <1E-15   | <1E-15   | 511                  |
|                             | GO:0005515 | protein binding                                            | 1.97E-12 | 7.16E-10 | 6651                 |
|                             | GO:0000166 | nucleotide binding                                         | 1.21E-11 | 3.38E-09 | 2012                 |
|                             | GO:0003723 | RNA binding                                                | 1.30E-11 | 3.38E-09 | 598                  |
|                             | GO:0005524 | ATP binding                                                | 3.50E-11 | 7.93E-09 | 1525                 |
|                             | GO:0016787 | hydrolase activity                                         | 1.66E-08 | 2.74E-06 | 962                  |
|                             | GO:0003677 | DNA binding                                                | 1.66E-07 | 2.01E-05 | 1692                 |
|                             | GO:0005737 | cytoplasm                                                  | 2.35E-07 | 2.67E-05 | 4680                 |
|                             | GO:0016853 | isomerase activity                                         | 3.35E-07 | 3.60E-05 | 115                  |
|                             | GO:0016874 | ligase activity                                            | 2.44E-06 | 2.33E-04 | 348                  |
|                             | GO:0008201 | heparin binding                                            | 2.90E-06 | 8.09E-04 | 112                  |
|                             | GO:0016740 | transferase activity                                       | 2.04E-05 | 1.35E-03 | 1191                 |
|                             | GO:0016779 | nucleotidyltransferase activity                            | 3.12E-05 | 1.96E-03 | 73                   |
|                             | GO:0004527 | exonuclease activity                                       | 4.05E-05 | 2.37E-03 | 37                   |
|                             | GO:0016363 | nuclear matrix                                             | 4.38E-05 | 2.52E-03 | 66                   |

**Supplementary Table 2A (con't). Upregulated Gene Sets in CML Compared to Normal Stem Cells**

| Category* | GO ID      | GO/KEGG Term               | P        | Q†       | Transcript Clusters‡ |
|-----------|------------|----------------------------|----------|----------|----------------------|
|           | GO:0008415 | acyl transferase           | 1.07E-04 | 5.03E-03 | 137                  |
|           | GO:0004519 | endonuclease activity      | 1.58E-04 | 6.84E-03 | 60                   |
|           | GO:0008168 | methyltransferase activity | 1.96E-04 | 8.18E-03 | 120                  |

**Supplementary Table 2B. Downregulated Gene Sets in CML Compared to Normal Stem Cells**

| Category*                            | GO ID      | GO/KEGG Term                                                                              | P        | Q†       | Transcript Clusters‡ |
|--------------------------------------|------------|-------------------------------------------------------------------------------------------|----------|----------|----------------------|
| Cell Surface/ECM                     | GO:0005886 | plasma membrane                                                                           | <1E-15   | <1E-15   | 2879                 |
|                                      | GO:0005576 | extracellular region                                                                      | <1E-15   | <1E-15   | 1739                 |
|                                      | GO:0005615 | extracellular space                                                                       | 6.10E-14 | 7.38E-11 | 746                  |
|                                      | GO:0016021 | integral to membrane                                                                      | 1.27E-12 | 1.15E-09 | 3853                 |
|                                      | GO:0007155 | cell adhesion                                                                             | 3.30E-08 | 1.71E-05 | 501                  |
|                                      | GO:0005887 | integral to plasma membrane                                                               | 1.52E-06 | 4.59E-04 | 1020                 |
|                                      | GO:0045202 | synapse                                                                                   | 3.65E-06 | 8.86E-04 | 252                  |
|                                      | GO:0005578 | proteinaceous extracellular matrix                                                        | 3.66E-06 | 8.86E-04 | 220                  |
|                                      | GO:0007156 | homophilic cell adhesion                                                                  | 3.97E-06 | 8.99E-04 | 106                  |
|                                      | GO:0030054 | cell junction                                                                             | 4.83E-06 | 1.03E-03 | 401                  |
|                                      | GO:0031225 | anchored to membrane                                                                      | 4.02E-05 | 5.83E-03 | 118                  |
| Differentiation/Development Programs | GO:0007275 | multicellular organismal development                                                      | 1.00E-09 | 7.28E-07 | 886                  |
|                                      | GO:0030154 | cell differentiation                                                                      | 1.15E-06 | 3.79E-04 | 472                  |
|                                      | KEGG       | nuclear receptors                                                                         | 1.83E-05 | 5.50E-04 | 40                   |
|                                      | GO:0001501 | skeletal system development                                                               | 1.77E-05 | 3.06E-03 | 132                  |
|                                      | GO:0007507 | heart development                                                                         | 3.12E-05 | 4.71E-03 | 127                  |
| Cellular Response to Stimuli         | GO:0004872 | receptor activity                                                                         | 2.61E-09 | 1.58E-06 | 1184                 |
|                                      | GO:0005509 | calcium ion binding                                                                       | 1.04E-07 | 4.73E-05 | 606                  |
|                                      | GO:0043565 | sequence-specific DNA binding                                                             | 2.63E-07 | 1.06E-04 | 459                  |
|                                      | GO:0050896 | response to stimulus                                                                      | 5.86E-07 | 2.13E-04 | 485                  |
|                                      | GO:0045944 | positive regulation of transcription from RNA polymerase II promoter                      | 5.18E-06 | 1.04E-03 | 320                  |
|                                      | GO:0003700 | sequence-specific DNA binding transcription factor activity                               | 8.06E-06 | 1.54E-03 | 936                  |
|                                      | GO:0008083 | growth factor activity                                                                    | 2.45E-05 | 4.04E-03 | 161                  |
|                                      | GO:0003705 | sequence-specific distal enhancer binding RNA polymerase II transcription factor activity | 2.94E-05 | 4.65E-03 | 78                   |
| Signaling Pathways                   | KEGG       | TGF-beta signaling pathway                                                                | 1.19E-05 | 5.50E-04 | 47                   |
|                                      | GO:0030509 | BMP signaling pathway                                                                     | 1.54E-05 | 2.79E-03 | 46                   |

GO and KEGG terms with a q-value < 0.01 are included in the table.

\*Common cellular process among a group of associated GO and KEGG terms.

†Q-value represents the false discovery rate of the p-value, as previously described[50].

‡Indicates the number of transcripts within the data set that fall within the specific GO or KEGG term.

**Supplementary Table 3. Predicted Upstream Regulator Molecules in CML Compared to Normal Stem Cells**

| Upstream Regulator*               | Fold Change (Expression)† | Molecule Type                     | Predicted Activation State‡ | Activation Z-score§ | P of overlap |
|-----------------------------------|---------------------------|-----------------------------------|-----------------------------|---------------------|--------------|
| BMP2                              | -1.256                    | growth factor                     | Inhibited                   | -5.532              | 4.21E-04     |
| EPAS1                             | -1.141                    | transcription regulator           | Inhibited                   | -4.946              | 2.07E-04     |
| PDGF BB                           | NA                        | complex                           | Inhibited                   | -4.686              | 1.09E-05     |
| TGFB1 (includes EG:21803)         | -1.080                    | growth factor                     | Inhibited                   | -4.610              | 9.84E-19     |
| CDKN2A                            | 1.034                     | transcription regulator           | Inhibited                   | -4.492              | 2.00E-04     |
| BNIP3L                            | 1.050                     | other                             | Inhibited                   | -4.451              | 4.55E-02     |
| let-7                             | NA                        | microRNA                          | Inhibited                   | -4.382              | 1.22E-02     |
| RAF1                              | 1.051                     | kinase                            | Inhibited                   | -4.279              | 8.94E-05     |
| IL1A                              | -1.340                    | cytokine                          | Inhibited                   | -4.266              | 4.40E-03     |
| TP53 (includes EG:22059)          | 1.245                     | transcription regulator           | Inhibited                   | -4.256              | 4.19E-10     |
| FGF2                              | 1.411                     | growth factor                     | Inhibited                   | -4.186              | 8.59E-06     |
| BDNF                              | -1.163                    | growth factor                     | Inhibited                   | -4.062              | 2.49E-03     |
| TNF                               | 1.205                     | cytokine                          | Inhibited                   | -4.049              | 9.28E-10     |
| GDF2                              | -1.226                    | growth factor                     | Inhibited                   | -4.048              | 7.48E-02     |
| RELA                              | -1.257                    | transcription regulator           | Inhibited                   | -4.040              | 3.92E-03     |
| CTNNB1                            | -1.275                    | transcription regulator           | Inhibited                   | -3.975              | 7.64E-07     |
| SP1                               | -1.027                    | transcription regulator           | Inhibited                   | -3.879              | 3.23E-04     |
| PGR (includes EG:18667)           | -1.128                    | ligand-dependent nuclear receptor | Inhibited                   | -3.853              | 1.59E-03     |
| HNF1A                             | 1.034                     | transcription regulator           | Inhibited                   | -3.850              | 2.01E-10     |
| P38 MAPK                          | NA                        | group                             | Inhibited                   | -3.792              | 3.71E-06     |
| NFkB (complex)                    | NA                        | complex                           | Inhibited                   | -3.716              | 9.58E-06     |
| PRKCZ                             | -1.278                    | kinase                            | Inhibited                   | -3.664              | 7.50E-02     |
| IL1B                              | 2.622                     | cytokine                          | Inhibited                   | -3.647              | 1.38E-05     |
| Pkc(s)                            | NA                        | group                             | Inhibited                   | -3.627              | 6.04E-03     |
| LEP                               | 1.490                     | growth factor                     | Inhibited                   | -3.589              | 3.02E-04     |
| RBL2 (includes EG:100331892)      | -1.551                    | other                             | Inhibited                   | -3.525              | 2.48E-01     |
| RAC1                              | -1.008                    | enzyme                            | Inhibited                   | -3.513              | 1.10E-02     |
| NEUROG3                           | 1.003                     | transcription regulator           | Inhibited                   | -3.506              | 2.44E-02     |
| MAPK1                             | 1.075                     | kinase                            | Inhibited                   | -3.504              | 5.08E-03     |
| IRGM                              | NA                        | other                             | Inhibited                   | -3.499              | 1.61E-01     |
| BMP6                              | -3.460                    | growth factor                     | Inhibited                   | -3.424              | 2.02E-02     |
| Rb                                | NA                        | group                             | Inhibited                   | -3.424              | 1.33E-01     |
| Secretase gamma                   | NA                        | complex                           | Inhibited                   | -3.393              | 6.79E-01     |
| EDN1                              | -2.110                    | cytokine                          | Inhibited                   | -3.378              | 1.09E-04     |
| EGR1                              | 1.126                     | transcription regulator           | Inhibited                   | -3.332              | 3.26E-03     |
| Tgf beta                          | NA                        | group                             | Inhibited                   | -3.323              | 9.25E-04     |
| BMP4                              | -1.609                    | growth factor                     | Inhibited                   | -3.319              | 5.03E-03     |
| I kappa b kinase                  | NA                        | complex                           | Inhibited                   | -3.300              | 3.62E-01     |
| GDNF                              | -1.451                    | growth factor                     | Inhibited                   | -3.290              | 1.25E-01     |
| BMPR1A                            | -1.041                    | kinase                            | Inhibited                   | -3.221              | 1.09E-01     |
| MAP3K1                            | NA                        | kinase                            | Inhibited                   | -3.194              | 8.11E-03     |
| F2                                | -1.057                    | peptidase                         | Inhibited                   | -3.192              | 3.85E-04     |
| ETS2                              | 1.235                     | transcription regulator           | Inhibited                   | -3.174              | 1.51E-01     |
| HNF4A                             | 1.062                     | transcription regulator           | Inhibited                   | -3.138              | 3.09E-23     |
| SIX5                              | 1.052                     | transcription regulator           | Inhibited                   | -3.134              | 6.68E-01     |
| OSM                               | 1.059                     | cytokine                          | Inhibited                   | -3.121              | 8.09E-07     |
| MAPK14                            | 1.033                     | kinase                            | Inhibited                   | -3.070              | 8.93E-03     |
| IKBKG                             | 1.085                     | kinase                            | Inhibited                   | -3.068              | 2.25E-01     |
| LDL                               | NA                        | complex                           | Inhibited                   | -3.066              | 5.68E-06     |
| GC-GCR dimer                      | NA                        | complex                           | Inhibited                   | -3.062              | 2.74E-01     |
| TAF4B                             | NA                        | transcription regulator           | Inhibited                   | -3.052              | 6.18E-01     |
| RB1                               | 1.342                     | transcription regulator           | Inhibited                   | -3.008              | 5.31E-05     |
| Calcineurin protein(s)            | NA                        | complex                           | Inhibited                   | -3.004              | 2.15E-01     |
| Ap1                               | NA                        | complex                           | Inhibited                   | -3.000              | 8.59E-02     |
| CTNNB-TCF/LEF                     | NA                        | complex                           | Inhibited                   | -3.000              | 4.35E-01     |
| TNFRSF11A                         | -1.081                    | transmembrane receptor            | Inhibited                   | -2.985              | 3.97E-01     |
| Nfat (family)                     | NA                        | group                             | Inhibited                   | -2.971              | 1.70E-01     |
| MAP2K1                            | -1.230                    | kinase                            | Inhibited                   | -2.965              | 6.30E-04     |
| LEF1                              | 1.069                     | transcription regulator           | Inhibited                   | -2.947              | 1.04E-01     |
| TRIM21                            | 1.363                     | enzyme                            | Inhibited                   | -2.947              | 4.35E-01     |
| SMAD1                             | -1.024                    | transcription regulator           | Inhibited                   | -2.944              | 6.23E-02     |
| TGFB3                             | -1.090                    | growth factor                     | Inhibited                   | -2.943              | 9.59E-04     |
| MAP2K5                            | -1.171                    | kinase                            | Inhibited                   | -2.939              | 6.46E-01     |
| IL6                               | 1.023                     | cytokine                          | Inhibited                   | -2.932              | 4.69E-08     |
| FXR ligand-FXR-Retinoic acid-RXRα | NA                        | complex                           | Inhibited                   | -2.930              | 1.09E-01     |
| EGF (includes EG:13645)           | -1.142                    | growth factor                     | Inhibited                   | -2.927              | 1.22E-05     |
| SMARCB1                           | 1.512                     | transcription regulator           | Inhibited                   | -2.922              | 1.13E-02     |
| hCG                               | NA                        | complex                           | Inhibited                   | -2.922              | 1.15E-05     |
| CRX                               | 1.026                     | transcription regulator           | Inhibited                   | -2.918              | 1.19E-01     |
| AVP                               | -1.145                    | other                             | Inhibited                   | -2.908              | 3.92E-02     |
| Creb                              | NA                        | group                             | Inhibited                   | -2.892              | 4.40E-03     |
| TCF3                              | 1.046                     | transcription regulator           | Inhibited                   | -2.877              | 3.10E-04     |
| Mapk                              | NA                        | group                             | Inhibited                   | -2.861              | 5.08E-02     |
| CHUK                              | 1.113                     | kinase                            | Inhibited                   | -2.817              | 4.96E-03     |
| PTH                               | -1.004                    | other                             | Inhibited                   | -2.813              | 9.52E-03     |
| NMDA Receptor                     | NA                        | complex                           | Inhibited                   | -2.813              | 1.00E00      |

**Supplementary Table 3 (con't). Predicted Upstream Regulator Molecules in CML Compared to Normal Stem Cells**

| Upstream Regulator*          | Fold Change (Expression)† | Molecule Type              | Predicted Activation State‡ | Activation Z-score§ | P of overlap |
|------------------------------|---------------------------|----------------------------|-----------------------------|---------------------|--------------|
| USF1                         | 1.178                     | transcription regulator    | Inhibited                   | -2.799              | 1.64E-02     |
| WWTR1                        | -1.315                    | transcription regulator    | Inhibited                   | -2.789              | 1.00E00      |
| ARNT                         | -1.000                    | transcription regulator    | Inhibited                   | -2.787              | 1.17E-01     |
| PDGFRB                       | 1.011                     | kinase                     | Inhibited                   | -2.784              | 4.77E-01     |
| ELK1                         | 1.078                     | transcription regulator    | Inhibited                   | -2.763              | 5.18E-02     |
| Smad2/3-Smad4                | NA                        | complex                    | Inhibited                   | -2.762              | 2.50E-01     |
| HIF1A                        | -1.114                    | transcription regulator    | Inhibited                   | -2.755              | 4.34E-03     |
| NTF4                         | -1.162                    | growth factor              | Inhibited                   | -2.749              | 2.74E-01     |
| SHH                          | 1.027                     | peptidase                  | Inhibited                   | -2.747              | 2.83E-03     |
| PTHLH                        | 1.174                     | other                      | Inhibited                   | -2.721              | 2.05E-02     |
| NPPC                         | 1.083                     | other                      | Inhibited                   | -2.714              | 3.62E-01     |
| ABCB6                        | 1.152                     | transporter                | Inhibited                   | -2.706              | 1.57E-01     |
| IKKBK                        | -1.014                    | kinase                     | Inhibited                   | -2.702              | 1.36E-02     |
| GAL                          | -1.214                    | other                      | Inhibited                   | -2.698              | 3.62E-01     |
| Crem                         | NA                        | other                      | Inhibited                   | -2.697              | 5.89E-02     |
| TGFA                         | 1.042                     | growth factor              | Inhibited                   | -2.680              | 1.46E-01     |
| PTGS2                        | -1.497                    | enzyme                     | Inhibited                   | -2.675              | 3.99E-04     |
| SELPGLG                      | 1.851                     | other                      | Inhibited                   | -2.646              | 2.61E-01     |
| GCK                          | -1.061                    | kinase                     | Inhibited                   | -2.635              | 9.02E-02     |
| CYBA                         | 1.079                     | enzyme                     | Inhibited                   | -2.630              | 5.23E-01     |
| ATF2                         | 1.120                     | transcription regulator    | Inhibited                   | -2.626              | 1.63E-01     |
| MYOD1                        | 1.022                     | transcription regulator    | Inhibited                   | -2.624              | 3.10E-02     |
| IL6R                         | -1.060                    | transmembrane receptor     | Inhibited                   | -2.623              | 6.17E-02     |
| F7                           | -1.001                    | peptidase                  | Inhibited                   | -2.608              | 5.68E-02     |
| INHBB                        | -1.126                    | growth factor              | Inhibited                   | -2.578              | 3.62E-01     |
| NFATC3                       | -1.006                    | transcription regulator    | Inhibited                   | -2.577              | 6.17E-02     |
| Pro-inflammatory Cytokine    | NA                        | group                      | Inhibited                   | -2.564              | 3.36E-01     |
| PAX3                         | -1.254                    | transcription regulator    | Inhibited                   | -2.551              | 1.76E-02     |
| TREM1                        | 1.167                     | other                      | Inhibited                   | -2.547              | 6.77E-03     |
| Vegf                         | NA                        | group                      | Inhibited                   | -2.547              | 3.36E-05     |
| AKT1                         | 1.072                     | kinase                     | Inhibited                   | -2.546              | 1.35E-04     |
| ARNT2                        | -1.151                    | transcription regulator    | Inhibited                   | -2.543              | 9.20E-05     |
| CPE (includes EG:12876)      | -1.137                    | peptidase                  | Inhibited                   | -2.543              | 1.57E-01     |
| INSIG1                       | -1.154                    | other                      | Inhibited                   | -2.535              | 1.57E-01     |
| IL31                         | -1.118                    | other                      | Inhibited                   | -2.531              | 3.97E-01     |
| Mek                          | NA                        | group                      | Inhibited                   | -2.513              | 4.88E-03     |
| USF2                         | -1.295                    | transcription regulator    | Inhibited                   | -2.505              | 4.91E-02     |
| PAX7                         | -1.096                    | transcription regulator    | Inhibited                   | -2.505              | 4.10E-01     |
| HOXC6                        | -1.044                    | transcription regulator    | Inhibited                   | -2.502              | 6.26E-01     |
| CYP51A1                      | 1.298                     | enzyme                     | Inhibited                   | -2.496              | 3.01E-01     |
| GABPA                        | 1.105                     | transcription regulator    | Inhibited                   | -2.495              | 7.50E-02     |
| MITF                         | -1.077                    | transcription regulator    | Inhibited                   | -2.469              | 2.15E-01     |
| IL21                         | -1.200                    | cytokine                   | Inhibited                   | -2.465              | 2.33E-02     |
| STAT3                        | -1.213                    | transcription regulator    | Inhibited                   | -2.459              | 8.70E-09     |
| GHRHR (includes EG:14602)    | -1.037                    | G-protein coupled receptor | Inhibited                   | -2.449              | 3.01E-01     |
| ERCC4                        | -1.081                    | enzyme                     | Inhibited                   | -2.449              | 5.23E-01     |
| INSIG2                       | -1.076                    | other                      | Inhibited                   | -2.441              | 3.01E-01     |
| CREB1                        | -1.003                    | transcription regulator    | Inhibited                   | -2.437              | 2.15E-03     |
| Growth hormone               | NA                        | group                      | Inhibited                   | -2.436              | 4.24E-03     |
| NDUFA13                      | 1.021                     | enzyme                     | Inhibited                   | -2.434              | 1.00E00      |
| GHSR (includes EG:100332193) | -1.022                    | G-protein coupled receptor | Inhibited                   | -2.433              | 5.74E-01     |
| PI3                          | 1.283                     | other                      | Inhibited                   | -2.425              | 5.74E-01     |
| CLU                          | -1.988                    | other                      | Inhibited                   | -2.425              | 3.01E-01     |
| IFNE                         | 1.002                     | cytokine                   | Inhibited                   | -2.424              | 9.02E-02     |
| ERG                          | -1.405                    | transcription regulator    | Inhibited                   | -2.424              | 2.14E-03     |
| GRN                          | -1.138                    | growth factor              | Inhibited                   | -2.412              | 5.23E-01     |
| GIP                          | 1.073                     | other                      | Inhibited                   | -2.408              | 5.23E-01     |
| HRH2                         | 1.250                     | G-protein coupled receptor | Inhibited                   | -2.400              | 4.35E-01     |
| NOTCH4                       | -1.088                    | transcription regulator    | Inhibited                   | -2.398              | 5.50E-01     |
| FOXO4                        | -1.201                    | transcription regulator    | Inhibited                   | -2.385              | 3.26E-02     |
| EP300                        | -1.010                    | transcription regulator    | Inhibited                   | -2.382              | 3.91E-03     |
| HDAC6                        | 1.109                     | transcription regulator    | Inhibited                   | -2.381              | 6.83E-02     |
| PTK2 (includes EG:14083)     | -2.350                    | kinase                     | Inhibited                   | -2.367              | 2.25E-02     |
| AMPK                         | NA                        | complex                    | Inhibited                   | -2.364              | 8.11E-03     |
| SMYD3                        | 1.339                     | enzyme                     | Inhibited                   | -2.360              | 2.50E-01     |
| HOXD3                        | -1.119                    | transcription regulator    | Inhibited                   | -2.357              | 2.08E-01     |
| STAT                         | NA                        | group                      | Inhibited                   | -2.347              | 5.68E-02     |
| PCDH11X/PCDH11Y              | 1.262                     | other                      | Inhibited                   | -2.346              | 1.43E-01     |
| VTN                          | -1.197                    | other                      | Inhibited                   | -2.336              | 9.02E-02     |
| RUNX2                        | -1.941                    | transcription regulator    | Inhibited                   | -2.310              | 3.24E-03     |
| IL1                          | NA                        | group                      | Inhibited                   | -2.306              | 4.54E-03     |
| AKT2                         | -1.083                    | kinase                     | Inhibited                   | -2.305              | 9.90E-02     |
| NTRK2                        | -1.009                    | kinase                     | Inhibited                   | -2.300              | 1.30E-01     |
| TGM2                         | 1.119                     | enzyme                     | Inhibited                   | -2.293              | 4.05E-02     |
| RBL1                         | 1.349                     | other                      | Inhibited                   | -2.289              | 2.85E-02     |
| MZF1                         | -1.028                    | transcription regulator    | Inhibited                   | -2.287              | 3.97E-01     |

Supplementary Table 3 (con't). Predicted Upstream Regulator Molecules in CML Compared to Normal Stem Cells

| Upstream Regulator*         | Fold Change (Expression)† | Molecule Type                     | Predicted Activation State‡ | Activation Z-score§ | P of overlap |
|-----------------------------|---------------------------|-----------------------------------|-----------------------------|---------------------|--------------|
| NRAS                        | 1.039                     | enzyme                            | Inhibited                   | -2.285              | 3.32E-02     |
| MUC1                        | 1.017                     | transcription regulator           | Inhibited                   | -2.284              | 9.90E-02     |
| SUZ12                       | 1.083                     | enzyme                            | Inhibited                   | -2.277              | 1.26E-01     |
| ITGAV                       | -1.134                    | other                             | Inhibited                   | -2.275              | 9.02E-02     |
| NRG1 (includes EG:112400)   | -1.060                    | growth factor                     | Inhibited                   | -2.271              | 1.60E-01     |
| PAX2                        | -1.067                    | transcription regulator           | Inhibited                   | -2.267              | 3.01E-01     |
| RBPJ                        | -1.118                    | transcription regulator           | Inhibited                   | -2.267              | 1.00E00      |
| PLAUR                       | -2.537                    | transmembrane receptor            | Inhibited                   | -2.262              | 2.61E-01     |
| PRKACA                      | 1.190                     | kinase                            | Inhibited                   | -2.249              | 2.97E-02     |
| WNT3A                       | 1.101                     | other                             | Inhibited                   | -2.237              | 1.72E-01     |
| AGA                         | 1.192                     | enzyme                            | Inhibited                   | -2.236              | 6.30E-01     |
| RND3                        | -2.909                    | enzyme                            | Inhibited                   | -2.236              | 6.30E-01     |
| FGFR1                       | -1.564                    | kinase                            | Inhibited                   | -2.228              | 4.55E-02     |
| LTBP1                       | -1.370                    | other                             | Inhibited                   | -2.228              | 1.43E-01     |
| LDB1                        | -1.018                    | transcription regulator           | Inhibited                   | -2.219              | 4.35E-01     |
| NPAS2                       | -1.097                    | transcription regulator           | Inhibited                   | -2.219              | 5.23E-01     |
| PP2A                        | NA                        | complex                           | Inhibited                   | -2.219              | 5.74E-01     |
| BPI                         | 1.024                     | transporter                       | Inhibited                   | -2.219              | 6.30E-01     |
| PHOX2A                      | -1.142                    | transcription regulator           | Inhibited                   | -2.219              | 6.30E-01     |
| Akt                         | NA                        | group                             | Inhibited                   | -2.217              | 1.46E-04     |
| GH1                         | -1.176                    | cytokine                          | Inhibited                   | -2.216              | 1.11E-03     |
| ADAM15                      | 1.078                     | peptidase                         | Inhibited                   | -2.213              | 5.74E-01     |
| NR1I3                       | -1.060                    | ligand-dependent nuclear receptor | Inhibited                   | -2.207              | 2.88E-02     |
| SIAH2                       | -1.031                    | transcription regulator           | Inhibited                   | -2.207              | 5.23E-01     |
| MIB1                        | -1.086                    | other                             | Inhibited                   | -2.203              | 1.00E00      |
| Smad1/5/8-Smad4             | NA                        | complex                           | Inhibited                   | -2.201              | 6.30E-01     |
| Gcn5l                       | NA                        | group                             | Inhibited                   | -2.200              | 5.74E-01     |
| ORAI1                       | 1.173                     | ion channel                       | Inhibited                   | -2.200              | 6.30E-01     |
| ITGA11                      | 1.014                     | other                             | Inhibited                   | -2.200              | 6.30E-01     |
| FOXO1                       | -1.043                    | transcription regulator           | Inhibited                   | -2.197              | 4.77E-01     |
| MTA1                        | 1.042                     | transcription regulator           | Inhibited                   | -2.195              | 1.50E-01     |
| CDKN1A                      | -2.110                    | kinase                            | Inhibited                   | -2.191              | 1.36E-02     |
| RXRG                        | -1.005                    | ligand-dependent nuclear receptor | Inhibited                   | -2.183              | 1.00E00      |
| Fgfr                        | NA                        | group                             | Inhibited                   | -2.178              | 1.00E00      |
| PAX9                        | -1.125                    | transcription regulator           | Inhibited                   | -2.177              | 5.74E-01     |
| ZBTB17                      | 1.004                     | transcription regulator           | Inhibited                   | -2.167              | 1.43E-01     |
| TNFSF11                     | -1.027                    | cytokine                          | Inhibited                   | -2.166              | 3.41E-04     |
| JUN                         | -1.322                    | transcription regulator           | Inhibited                   | -2.162              | 1.61E-06     |
| PTGER2                      | -1.595                    | G-protein coupled receptor        | Inhibited                   | -2.160              | 7.50E-02     |
| PPP3CA                      | 1.075                     | phosphatase                       | Inhibited                   | -2.159              | 3.09E-02     |
| CREBBP                      | -1.159                    | transcription regulator           | Inhibited                   | -2.158              | 3.22E-02     |
| NOS1                        | -1.069                    | enzyme                            | Inhibited                   | -2.158              | 3.97E-01     |
| Pka catalytic subunit       | NA                        | group                             | Inhibited                   | -2.158              | 1.00E00      |
| ING4                        | 1.281                     | transcription regulator           | Inhibited                   | -2.157              | 4.77E-01     |
| BAG1                        | 1.229                     | other                             | Inhibited                   | -2.156              | 3.30E-01     |
| LOXL2                       | -1.098                    | enzyme                            | Inhibited                   | -2.156              | 6.30E-01     |
| PRKCH                       | -2.123                    | kinase                            | Inhibited                   | -2.147              | 5.74E-01     |
| FOS                         | -2.113                    | transcription regulator           | Inhibited                   | -2.144              | 8.74E-05     |
| CLOCK                       | -1.060                    | transcription regulator           | Inhibited                   | -2.144              | 3.64E-02     |
| SLC30A3                     | -1.205                    | transporter                       | Inhibited                   | -2.138              | 4.77E-01     |
| FLNA                        | -1.070                    | other                             | Inhibited                   | -2.138              | 1.00E00      |
| STAT1/3/5 dimer             | NA                        | complex                           | Inhibited                   | -2.137              | 7.13E-01     |
| TRAF6                       | 1.067                     | enzyme                            | Inhibited                   | -2.134              | 3.18E-01     |
| KDM5B                       | 1.002                     | transcription regulator           | Inhibited                   | -2.130              | 2.61E-01     |
| NR4A2                       | -2.930                    | ligand-dependent nuclear receptor | Inhibited                   | -2.129              | 3.54E-01     |
| CAMK4                       | -1.136                    | kinase                            | Inhibited                   | -2.129              | 6.18E-01     |
| TWIST2                      | NA                        | transcription regulator           | Inhibited                   | -2.125              | 4.62E-01     |
| IL9                         | -1.022                    | cytokine                          | Inhibited                   | -2.124              | 4.09E-01     |
| SIM1 (includes EG:20464)    | -1.005                    | transcription regulator           | Inhibited                   | -2.112              | 6.25E-05     |
| Collagen Alpha1             | NA                        | group                             | Inhibited                   | -2.111              | 3.97E-01     |
| ELF4                        | -1.148                    | transcription regulator           | Inhibited                   | -2.109              | 5.68E-02     |
| ADCYAP1 (includes EG:11516) | 1.029                     | other                             | Inhibited                   | -2.065              | 4.58E-05     |
| PTGER4                      | -1.666                    | G-protein coupled receptor        | Inhibited                   | -2.063              | 1.19E-01     |
| BMP7                        | 1.058                     | growth factor                     | Inhibited                   | -2.048              | 8.53E-04     |
| MEF2A                       | 1.323                     | transcription regulator           | Inhibited                   | -2.048              | 4.90E-01     |
| GAST                        | 1.055                     | other                             | Inhibited                   | -2.039              | 2.44E-02     |
| TLR9                        | -1.042                    | transmembrane receptor            | Inhibited                   | -2.038              | 6.54E-02     |
| SMO                         | 1.017                     | G-protein coupled receptor        | Inhibited                   | -2.037              | 6.46E-01     |
| TOB1                        | -1.598                    | transcription regulator           | Inhibited                   | -2.036              | 2.47E-02     |
| CD47                        | 1.174                     | other                             | Inhibited                   | -2.035              | 3.30E-01     |
| CCR1                        | -1.056                    | G-protein coupled receptor        | Inhibited                   | -2.034              | 1.43E-01     |
| STAT5A                      | 1.018                     | transcription regulator           | Inhibited                   | -2.034              | 2.17E-01     |
| CYR61                       | -1.285                    | other                             | Inhibited                   | -2.033              | 5.18E-02     |
| IFNG (includes EG:15978)    | -1.056                    | cytokine                          | Inhibited                   | -2.031              | 4.06E-09     |
| Retnlb                      | NA                        | other                             | Inhibited                   | -2.031              | 1.64E-02     |
| CRY2                        | -1.235                    | enzyme                            | Inhibited                   | -2.029              | 3.97E-01     |

Supplementary Table 3 (con't). Predicted Upstream Regulator Molecules in CML Compared to Normal Stem Cells

| Upstream Regulator*                           | Fold Change (Expression)† | Molecule Type              | Predicted Activation State‡ | Activation Z-score§ | P of overlap |
|-----------------------------------------------|---------------------------|----------------------------|-----------------------------|---------------------|--------------|
| Fgf                                           | NA                        | group                      | Inhibited                   | -2.028              | 8.22E-02     |
| SELP                                          | -4.856                    | other                      | Inhibited                   | -2.028              | 2.44E-01     |
| NCOA6                                         | 1.261                     | transcription regulator    | Inhibited                   | -2.026              | 2.74E-01     |
| POMC                                          | -1.066                    | other                      | Inhibited                   | -2.025              | 4.68E-02     |
| PLAG1                                         | -5.021                    | transcription regulator    | Inhibited                   | -2.017              | 2.86E-01     |
| ADAM12                                        | -1.146                    | peptidase                  | Inhibited                   | -2.016              | 4.77E-01     |
| NEUROD1                                       | -1.066                    | transcription regulator    | Inhibited                   | -2.011              | 7.50E-02     |
| SRC (family)                                  | NA                        | group                      | Inhibited                   | -2.006              | 3.61E-01     |
| BLVRA                                         | 1.006                     | enzyme                     | Inhibited                   | -2.000              | 6.91E-01     |
| NPC1L1 (includes EG:100329429)                | -1.171                    | transporter                | Inhibited                   | -2.000              | 6.91E-01     |
| SLCO1C1                                       | -1.055                    | transporter                | Inhibited                   | -2.000              | 6.91E-01     |
| CREB3L4                                       | -1.070                    | transcription regulator    | Inhibited                   | -2.000              | 6.91E-01     |
| WDR5                                          | NA                        | enzyme                     | Inhibited                   | -2.000              | 6.91E-01     |
| Csf                                           | NA                        | group                      | Inhibited                   | -2.000              | 6.91E-01     |
| FGF13                                         | 1.117                     | growth factor              | Inhibited                   | -2.000              | 6.91E-01     |
| ITIH2                                         | -1.087                    | other                      | Inhibited                   | -2.000              | 6.91E-01     |
| FUT4                                          | -1.168                    | enzyme                     | Inhibited                   | -2.000              | 6.91E-01     |
| ITIH1                                         | -1.077                    | other                      | Inhibited                   | -2.000              | 6.91E-01     |
| LMX1A                                         | 1.118                     | transcription regulator    | Inhibited                   | -2.000              | 6.91E-01     |
| RBPJL                                         | -1.081                    | transcription regulator    | Inhibited                   | -2.000              | 1.00E00      |
| MTF2 (includes EG:17765)                      | 1.287                     | transcription regulator    | Activated                   | 2.000               | 6.30E-01     |
| GCLM                                          | -1.776                    | enzyme                     | Activated                   | 2.000               | 6.30E-01     |
| Tlr11                                         | NA                        | other                      | Activated                   | 2.000               | 6.91E-01     |
| TLR10                                         | -1.121                    | transmembrane receptor     | Activated                   | 2.000               | 6.91E-01     |
| Tlr13                                         | NA                        | other                      | Activated                   | 2.000               | 6.91E-01     |
| Tlr12                                         | NA                        | other                      | Activated                   | 2.000               | 6.91E-01     |
| B-cell receptor                               | NA                        | complex                    | Activated                   | 2.000               | 6.91E-01     |
| SCAVENGER RECEPTOR CLASS A                    | NA                        | group                      | Activated                   | 2.000               | 6.91E-01     |
| PKIA                                          | 1.062                     | other                      | Activated                   | 2.000               | 6.91E-01     |
| Npb                                           | NA                        | other                      | Activated                   | 2.000               | 6.91E-01     |
| miR-339-5p (and other miRNAs w/seed CCCUGUC)  | NA                        | mature microRNA            | Activated                   | 2.000               | 6.91E-01     |
| miR-294-5p (and other miRNAs w/seed CUCAAAA)  | NA                        | mature microRNA            | Activated                   | 2.000               | 6.91E-01     |
| AMBN                                          | -1.268                    | growth factor              | Activated                   | 2.000               | 6.91E-01     |
| GPAM                                          | 1.390                     | enzyme                     | Activated                   | 2.000               | 6.91E-01     |
| PILRB                                         | 1.335                     | other                      | Activated                   | 2.000               | 6.91E-01     |
| PRKAR2B                                       | 1.123                     | kinase                     | Activated                   | 2.005               | 4.35E-01     |
| GABBR1                                        | -1.020                    | G-protein coupled receptor | Activated                   | 2.008               | 5.23E-01     |
| EPHB6                                         | 1.004                     | kinase                     | Activated                   | 2.047               | 2.28E-01     |
| SOX2                                          | NA                        | transcription regulator    | Activated                   | 2.059               | 4.68E-02     |
| E2F1                                          | 1.096                     | transcription regulator    | Activated                   | 2.065               | 7.20E-06     |
| SCAP                                          | -1.005                    | other                      | Activated                   | 2.076               | 6.65E-02     |
| HAND1                                         | 1.002                     | transcription regulator    | Activated                   | 2.100               | 2.74E-01     |
| NFKBIB                                        | -1.037                    | transcription regulator    | Activated                   | 2.102               | 1.60E-01     |
| ACTB                                          | 1.071                     | other                      | Activated                   | 2.111               | 3.30E-01     |
| IL4R                                          | -1.357                    | transmembrane receptor     | Activated                   | 2.132               | 2.08E-01     |
| ETV6                                          | -1.170                    | transcription regulator    | Activated                   | 2.136               | 4.35E-01     |
| Fibrinogen                                    | NA                        | complex                    | Activated                   | 2.155               | 1.89E-01     |
| DES                                           | -1.111                    | other                      | Activated                   | 2.178               | 5.74E-01     |
| miR-196a-5p (and other miRNAs w/seed AGGUAGU) | NA                        | mature microRNA            | Activated                   | 2.200               | 3.62E-01     |
| APOB                                          | -1.056                    | transporter                | Activated                   | 2.200               | 4.09E-01     |
| SLAMF1                                        | -1.228                    | transmembrane receptor     | Activated                   | 2.200               | 5.74E-01     |
| TAF4 (includes EG:100149942)                  | 1.137                     | transcription regulator    | Activated                   | 2.214               | 6.89E-02     |
| miR-292-5p (and other miRNAs w/seed CUCAAAC)  | NA                        | mature microRNA            | Activated                   | 2.214               | 1.00E00      |
| miR-132-3p (and other miRNAs w/seed AACAGUC)  | NA                        | mature microRNA            | Activated                   | 2.216               | 1.00E00      |
| IRF5                                          | -1.000                    | transcription regulator    | Activated                   | 2.222               | 1.50E-01     |
| E2F2                                          | 1.109                     | transcription regulator    | Activated                   | 2.229               | 4.55E-02     |
| miR-10a-5p (and other miRNAs w/seed ACCUGU)   | NA                        | mature microRNA            | Activated                   | 2.231               | 6.30E-01     |
| POU2AF1                                       | 1.091                     | transcription regulator    | Activated                   | 2.261               | 1.00E00      |
| CCL2                                          | -1.311                    | cytokine                   | Activated                   | 2.267               | 1.70E-02     |
| KLF15                                         | -1.057                    | transcription regulator    | Activated                   | 2.282               | 4.12E-01     |
| HHEX                                          | 1.036                     | transcription regulator    | Activated                   | 2.298               | 3.97E-01     |
| CR1L                                          | NA                        | other                      | Activated                   | 2.331               | 9.02E-02     |
| PARP9                                         | 1.200                     | other                      | Activated                   | 2.359               | 1.00E00      |
| EHMT2                                         | 1.069                     | transcription regulator    | Activated                   | 2.375               | 2.28E-01     |
| HNRNPK                                        | -1.180                    | other                      | Activated                   | 2.392               | 4.77E-01     |
| PIK3CD                                        | -1.130                    | kinase                     | Activated                   | 2.401               | 6.46E-01     |
| NOG                                           | -1.254                    | other                      | Activated                   | 2.416               | 1.39E-01     |
| THY1                                          | 1.001                     | other                      | Activated                   | 2.424               | 1.00E00      |
| FHIT                                          | NA                        | enzyme                     | Activated                   | 2.436               | 3.85E-01     |
| SMOC2                                         | -1.090                    | other                      | Activated                   | 2.449               | 5.74E-01     |
| NRF1                                          | -1.116                    | transcription regulator    | Activated                   | 2.470               | 3.36E-01     |
| SMAD7                                         | -1.504                    | transcription regulator    | Activated                   | 2.471               | 9.28E-04     |
| GAB1                                          | 1.055                     | other                      | Activated                   | 2.570               | 1.00E00      |
| NPC1                                          | 1.085                     | transporter                | Activated                   | 2.573               | 3.57E-02     |
| mir-34                                        | NA                        | microRNA                   | Activated                   | 2.592               | 3.62E-01     |
| miR-222-3p (and other miRNAs w/seed GCUACAU)  | NA                        | mature microRNA            | Activated                   | 2.607               | 1.31E-01     |



**Supplementary Table 3 (con't). Predicted Upstream Regulator Molecules in CML Compared to Normal Stem Cells**

| Upstream Regulator*                          | Fold Change (Expression)† | Molecule Type           | Predicted Activation State‡ | Activation Z-score§ | P of overlap |
|----------------------------------------------|---------------------------|-------------------------|-----------------------------|---------------------|--------------|
| CXCL2                                        | -1.217                    | cytokine                | Activated                   | 2.622               | 3.62E-01     |
| SPDEF                                        | -1.044                    | transcription regulator | Activated                   | 2.630               | 2.44E-02     |
| S100A6                                       | -1.260                    | transporter             | Activated                   | 2.641               | 2.98E-01     |
| MYC                                          | 1.669                     | transcription regulator | Activated                   | 2.646               | 5.35E-05     |
| miR-92a-3p (and other miRNAs w/seed AUUGCAC) | NA                        | mature microRNA         | Activated                   | 2.701               | 1.89E-01     |
| COBRA1                                       | NA                        | other                   | Activated                   | 2.714               | 7.13E-01     |
| SATB1                                        | -1.158                    | transcription regulator | Activated                   | 2.716               | 6.59E-02     |
| NME1 (includes EG:18102)                     | 1.603                     | kinase                  | Activated                   | 2.781               | 1.04E-01     |
| CLCA2                                        | -1.052                    | ion channel             | Activated                   | 2.896               | 3.30E-01     |
| ZNF217                                       | 1.216                     | transcription regulator | Activated                   | 2.967               | 1.10E-02     |
| ARHGDIG                                      | -1.115                    | other                   | Activated                   | 3.000               | 1.00E00      |
| FBN1                                         | -1.294                    | other                   | Activated                   | 3.220               | 2.28E-01     |
| REST                                         | -1.118                    | transcription regulator | Activated                   | 3.291               | 9.81E-03     |
| miR-19b-3p (and other miRNAs w/seed GUGCAAA) | NA                        | mature microRNA         | Activated                   | 3.413               | 3.30E-01     |
| miR-17-5p (and other miRNAs w/seed AAAGUGC)  | NA                        | mature microRNA         | Activated                   | 3.432               | 6.65E-02     |
| CCND1                                        | -1.396                    | other                   | Activated                   | 3.683               | 3.40E-02     |
| EP400                                        | 1.080                     | other                   | Activated                   | 3.709               | 3.57E-02     |
| Alpha catenin                                | NA                        | group                   | Activated                   | 3.786               | 4.01E-03     |
| TBX2                                         | -1.016                    | transcription regulator | Activated                   | 4.672               | 9.36E-03     |

Molecules in the Ingenuity® Knowledge Base (Ingenuity® Systems, [www.ingenuity.com](http://www.ingenuity.com)) with a p-value no greater than 0.05 or Z-score greater than 2 or less than -2 are represented in the table.

NA indicates not applicable.

\*Indicates a molecule predicted to explain a significant portion of the expression differences between CML and normal stem cells, as determined by calculation of p-value and Z-score, as described (Ingenuity® Systems, [www.ingenuity.com](http://www.ingenuity.com)).

†Calculated between CML stem and normal stem cell populations from five CML or normal marrow donors from log2 transformed, default RMA background corrected array intensities. Positive values indicate upregulation of the upstream regulator in CML stem populations, and negative values indicate downregulation in CML stem cells compared to normal.

‡Activity of the molecule predicted by Z-score calculation. A Z-score greater than 2 is activated, and less than -2 is inhibited.

§Z-score is calculated as described (Ingenuity® Systems, [www.ingenuity.com](http://www.ingenuity.com)).

|| P-value is calculated by Fisher's Exact test, as described (Ingenuity® Systems, [www.ingenuity.com](http://www.ingenuity.com)).

**Supplementary Table 4. Alternatively Spliced Transcripts in CML Compared to Normal Stem Cells**

| Transcript Cluster ID* | Gene Symbol | RefSeq ID    | Genomic Location† | P (Alternative Splicing)‡ | P (Expression)§ | Fold Change (Expression) |
|------------------------|-------------|--------------|-------------------|---------------------------|-----------------|--------------------------|
| 2624385                | CACNA1D     | NM_000720    | 3p14.3            | 0.00E+00                  | 5.70E-04        | 3.006                    |
| 2858134                | PDE4D       | NM_001165899 | 5q12              | 2.79E-38                  | 1.28E-02        | 1.382                    |
| 2584018                | DPP4        | NM_001935    | 2q24.3            | 4.82E-32                  | 2.39E-04        | 7.181                    |
| 3323891                | GAS2        | NM_005256    | 11p14.3           | 9.88E-23                  | 1.60E-06        | 15.444                   |
| 3000984                | ABCA13      | NM_152701    | 7p12.3            | 3.79E-20                  | 2.13E-02        | -2.057                   |
| 3198346                | PTPRD       | NM_002839    | 9p23-p24.3        | 2.84E-19                  | 2.04E-04        | 4.848                    |
| 3934111                | SIK1        | NM_173354    | 21q22.3           | 1.49E-18                  | 1.15E-03        | -2.347                   |
| 3290875                | ANK3        | NM_020987    | 10q21             | 3.79E-18                  | 7.02E-04        | -2.764                   |
| 2503374                | GLI2        | NM_005270    | 2q14              | 4.55E-18                  | 4.88E-02        | 1.172                    |
| 2749484                | RXFP1       | NM_021634    | 4q32.1            | 2.78E-16                  | 6.63E-04        | 7.799                    |
| 3484497                | FRY         | NM_023037    | 13q13.1           | 2.13E-15                  | 3.68E-03        | -2.989                   |
| 2316379                | SKI         | NM_003036    | 1q22-q24          | 6.40E-14                  | 3.69E-03        | -1.576                   |
| 3174121                | MAMDC2      | NM_153267    | 9q21.12           | 1.45E-13                  | 7.91E-05        | 4.734                    |
| 2880292                | DPYSL3      | NM_001197294 | 5q32              | 5.17E-13                  | 4.89E-04        | 2.158                    |
| 2926969                | PDE7B       | NM_018945    | 6q23-q24          | 5.41E-13                  | 6.89E-03        | 1.778                    |
| 2922215                | MARCKS      | NM_002356    | 6q22.2            | 5.67E-13                  | 8.51E-07        | 2.196                    |
| 2340529                | PDE4B       | NM_002600    | 1p31              | 2.77E-12                  | 6.63E-03        | -2.088                   |
| 3491486                | PCDH17      | NM_001040429 | 13q21.1           | 3.17E-12                  | 9.34E-03        | -2.279                   |
| 3850069                | DNMT1       | NM_001130823 | 19p13.2           | 2.16E-11                  | 1.62E-02        | 1.493                    |
| 2883440                | ADAM19      | NM_033274    | 5q33.3            | 4.55E-11                  | 7.74E-03        | 1.443                    |
| 2412799                | ORC1        | NM_004153    | 1p32              | 9.01E-11                  | 5.74E-04        | 1.972                    |
| 3252036                | PLAU        | NM_002658    | 10q24             | 1.10E-10                  | 5.04E-03        | 1.722                    |
| 3798778                | FAM38B      | NM_022068    | 18p11.22          | 2.00E-10                  | 3.40E-05        | 13.515                   |
| 2730746                | SLC4A4      | NM_001098484 | 4q21              | 2.98E-10                  | 3.21E-03        | 2.584                    |
| 2468811                | ASAP2       | NM_003887    | 2p25; 2p24        | 6.29E-10                  | 1.01E-02        | 1.866                    |
| 2333907                | RNF220      | NM_018150    | 1p34.1            | 6.52E-10                  | 7.30E-01        | 1.026                    |
| 3508696                | N4BP2L2     | NM_014887    | 13q13.1           | 9.38E-10                  | 6.72E-01        | -1.036                   |
| 3415229                | NR4A1       | NM_002135    | 12q13             | 9.74E-10                  | 3.45E-03        | -2.148                   |
| 2788926                | NR3C2       | NM_000901    | 4q31.1            | 1.40E-09                  | 1.43E-02        | -2.029                   |
| 2340433                | LEPR        | NM_002303    | 1p31              | 1.74E-09                  | 1.30E-02        | 2.265                    |
| 2469213                | KLF11       | NM_003597    | 2p25              | 1.81E-09                  | 6.77E-05        | -2.237                   |
| 2952834                | KCNK5       | NM_003740    | 6p21              | 2.11E-09                  | 4.05E-04        | 2.244                    |
| 3097152                | MCM4        | NM_005914    | 8q11.2            | 2.55E-09                  | 5.02E-03        | 2.247                    |
| 2569215                | ST6GAL2     | NM_032528    | 2q11.2-q          | 2.87E-09                  | 3.33E-03        | -2.258                   |
| 3544525                | FOS         | NM_005252    | 14q24.3           | 3.70E-09                  | 1.13E-02        | -2.025                   |
| 3479181                | POLE        | NM_006231    | 12q24.3           | 4.42E-09                  | 2.46E-03        | 1.762                    |
| 2987632                | TTYH3       | NM_025250    | 7p22              | 5.06E-09                  | 2.56E-02        | 1.199                    |
| 3613300                | NIPA2       | NM_001184889 | 15q11.2           | 6.68E-09                  | 3.54E-02        | 1.323                    |
| 3242353                | CREM        | NM_183013    | 10p11.21          | 8.54E-09                  | 7.72E-03        | -1.870                   |
| 3070309                | CADPS2      | NM_017954    | 7q31.3            | 1.06E-08                  | 2.56E-03        | -2.023                   |
| 2588127                | ATP5G3      | NM_001190329 | 2q31.1            | 1.93E-08                  | 7.88E-03        | 1.335                    |
| 3911217                | PMEP1A1     | NM_020182    | 20q13.31-q13.33   | 2.12E-08                  | 2.82E-02        | -1.665                   |
| 2897899                | SOX4        | NM_003107    | 6p22.3            | 2.54E-08                  | 3.84E-02        | 1.243                    |
| 2560195                | PCGF1       | NM_032673    | 2p13.1            | 2.63E-08                  | 2.14E-02        | 1.269                    |
| 2319252                | SPSB1       | NM_025106    | 1p36.22           | 2.77E-08                  | 3.21E-02        | -1.950                   |
| 3579546                | WARS        | NM_004184    | 14q32.31          | 3.95E-08                  | 2.79E-01        | 1.165                    |
| 3606304                | AKAP13      | NM_006738    | 15q24-q25         | 5.04E-08                  | 7.23E-03        | -1.352                   |
| 2736322                | PDLIM5      | NM_006457    | 4q22              | 6.27E-08                  | 9.01E-01        | 1.014                    |
| 2508520                | KYNU        | NM_003937    | 2q22.2            | 6.50E-08                  | 1.13E-03        | 3.525                    |
| 2515050                | GORASP2     | NM_015530    | 2q31.1-q31.2      | 7.43E-08                  | 3.37E-03        | 1.337                    |
| 3411721                | CNTN1       | NM_001843    | 12q11-q12         | 7.90E-08                  | 2.88E-03        | -4.067                   |
| 2776372                | WDFY3       | NM_014991    | 4q21.23           | 9.69E-08                  | 1.66E-03        | -1.889                   |
| 3610804                | IGF1R       | NM_000875    | 15q26.3           | 9.71E-08                  | 2.17E-03        | -2.499                   |
| 2394626                | ACOT7       | NM_007274    | 1p36              | 1.12E-07                  | 1.01E-01        | 1.132                    |
| 3802602                | CDH2        | NM_001792    | 18q11.2           | 1.28E-07                  | 3.33E-04        | -4.658                   |
| 3279982                | PTPLA       | NM_014241    | 10p14-p13         | 1.34E-07                  | 1.62E-03        | 1.583                    |
| 4021149                | SMARCA1     | NM_003069    | Xq25              | 1.34E-07                  | 8.01E-03        | 2.846                    |
| 2455418                | PTPN14      | NM_005401    | 1q32.2            | 1.52E-07                  | 2.02E-02        | 2.834                    |

**Supplementary Table 4 (con't). Alternatively Spliced Transcripts in CML Compared to Normal Stem Cells**

| Transcript Cluster ID* | Gene Symbol | RefSeq ID    | Genomic Location† | P (Alternative Splicing)‡ | P (Expression)§ | Fold Change (Expression) |
|------------------------|-------------|--------------|-------------------|---------------------------|-----------------|--------------------------|
| 2905169                | CDKN1A      | NM_000389    | 6p21.2            | 1.52E-07                  | 7.75E-03        | -2.138                   |
| 3415193                | GRASP       | NM_181711    | 12q13.13          | 1.58E-07                  | 6.94E-03        | -1.650                   |
| 3525234                | IRS2        | NM_003749    | 13q34             | 1.95E-07                  | 1.08E-03        | -1.368                   |
| 2447414                | NCF2        | NM_000433    | 1q25              | 2.62E-07                  | 8.18E-04        | 1.621                    |
| 3944690                | CYTH4       | NM_013385    | 22q12.3-q13.1     | 3.34E-07                  | 2.60E-03        | 1.478                    |
| 2520429                | MYO1B       | NM_001130158 | 2q12-q34          | 3.56E-07                  | 1.38E-02        | 3.013                    |
| 3585905                | APBA2       | NM_005503    | 15q11-q12         | 3.71E-07                  | 5.26E-03        | 1.561                    |
| 2475628                | YPEL5       | NM_001127401 | 2p23.1            | 3.94E-07                  | 5.61E-04        | -1.795                   |
| 3673684                | CDT1        | NM_030928    | 16q24.3           | 4.17E-07                  | 2.82E-03        | 1.274                    |
| 3203482                | BAG1        | NM_004323    | 9p12              | 4.55E-07                  | 2.27E-03        | 1.168                    |
| 3741547                | P2RX5       | NM_002561    | 17p13.3           | 4.99E-07                  | 4.13E-04        | 1.494                    |
| 2748198                | KIAA0922    | NM_001131007 | 4q31.3            | 5.05E-07                  | 2.06E-04        | 1.790                    |
| 3367788                | DCDC5       | NM_020869    | 11p14.1           | 5.36E-07                  | 4.63E-02        | 1.712                    |
| 3012381                | AKAP9       | NM_005751    | 7q21-q22          | 5.39E-07                  | 2.39E-01        | 1.183                    |
| 3555817                | ZNF219      | NM_016423    | 14q11             | 5.88E-07                  | 7.95E-02        | -1.161                   |
| 2564599                | MRPS5       | NM_031902    | 2p11.2-q11.2      | 6.20E-07                  | 2.47E-03        | 1.323                    |
| 3720921                | RARA        | NM_000964    | 17q21             | 6.29E-07                  | 1.24E-03        | -1.975                   |
| 2513471                | SCN2A       | NM_021007    | 2q24.3            | 8.18E-07                  | 9.91E-03        | 2.112                    |
| 3320717                | MICAL2      | NM_014632    | 11p15.3           | 8.34E-07                  | 2.29E-02        | 1.496                    |
| 3976062                | UBA1        | NM_003334    | Xp11.23           | 8.90E-07                  | 8.48E-01        | -1.019                   |
| 2732391                | CCNG2       | NM_004354    | 4q21.1            | 8.99E-07                  | 3.27E-01        | 1.114                    |
| 2733287                | PRDM8       | NM_020226    | 4q21              | 9.09E-07                  | 5.29E-02        | 1.282                    |
| 2971801                | MAN1A1      | NM_005907    | 6q22              | 9.10E-07                  | 1.52E-02        | -2.163                   |
| 3970642                | CDKL5       | NM_001037343 | Xp22              | 9.40E-07                  | 3.05E-02        | -1.519                   |
| 2658785                | FAM43A      | NM_153690    | 3q29              | 1.02E-06                  | 1.35E-02        | -1.412                   |
| 2470838                | MYCN        | NM_005378    | 2p24.3            | 1.11E-06                  | 3.56E-04        | 1.885                    |
| 3507282                | FLT1        | NM_002019    | 13q12             | 1.13E-06                  | 1.45E-02        | -1.424                   |
| 2877257                | BRD8        | NM_139199    | 5q31              | 1.17E-06                  | 1.59E-04        | 1.483                    |
| 2709778                | BCL6        | NM_001706    | 3q27              | 1.26E-06                  | 2.45E-03        | -2.264                   |
| 3249587                | SIRT1       | NM_012238    | 10q21.3           | 1.33E-06                  | 1.51E-02        | -1.425                   |
| 2620448                | CLEC3B      | NM_003278    | 3p22-p21.3        | 1.36E-06                  | 1.48E-02        | -2.136                   |
| 2343334                | GIPC2       | NM_017655    | 1p31.1            | 1.52E-06                  | 5.28E-03        | -3.367                   |
| 3181976                | NR4A3       | NM_006981    | 9q22              | 1.55E-06                  | 6.18E-03        | -2.725                   |
| 2647647                | TSC22D2     | NM_014779    | 3q25.1            | 1.76E-06                  | 3.16E-03        | -1.797                   |
| 3866898                | LIG1        | NM_000234    | 19q13.2-q13.3     | 1.79E-06                  | 1.81E-03        | 1.313                    |
| 2437152                | THBS3       | NM_007112    | 1q21              | 1.80E-06                  | 2.71E-01        | 1.154                    |
| 2882098                | SPARC       | NM_003118    | 5q31.3-q32        | 1.81E-06                  | 4.47E-02        | 1.773                    |
| 2674047                | LAMB2       | NM_002292    | 3p21              | 1.82E-06                  | 1.40E-02        | 1.246                    |
| 3648995                | ERCC4       | NM_005236    | 16p13.12          | 1.87E-06                  | 9.37E-01        | -1.015                   |
| 2686458                | ABI3BP      | NM_015429    | 3q12              | 2.11E-06                  | 3.31E-02        | -2.633                   |
| 3385769                | CTSC        | NM_001814    | 11q14.2           | 2.33E-06                  | 2.24E-03        | 1.785                    |
| 2694314                | GATA2       | NM_032638    | 3q21.3            | 2.36E-06                  | 5.32E-02        | 1.223                    |
| 3969358                | EGFL6       | NM_015507    | Xp22              | 2.41E-06                  | 6.35E-02        | 2.080                    |
| 2680046                | ADAMTS9     | NM_182920    | 3p14.1            | 2.49E-06                  | 2.61E-02        | -1.291                   |
| 2403740                | SRSF4       | NM_005626    | 1p35.3            | 2.72E-06                  | 1.61E-02        | 1.445                    |
| 2783788                | PRDM5       | NM_018699    | 4q25-q26          | 2.97E-06                  | 3.95E-02        | -1.700                   |
| 3237396                | CACNB2      | NM_201571    | 10p12             | 3.29E-06                  | 1.36E-02        | 2.487                    |
| 2628682                | ARL6IP5     | NM_006407    | 3p14              | 3.32E-06                  | 2.83E-02        | 1.454                    |
| 3587495                | SCG5        | NM_001144757 | 15q13-q14         | 3.34E-06                  | 3.44E-03        | -1.916                   |
| 3662774                | GPR114      | NM_153837    | 16q21             | 3.43E-06                  | 1.11E-04        | 1.282                    |
| 3865119                | ZNF296      | NM_145288    | 19q13.32          | 3.63E-06                  | 2.18E-01        | -1.107                   |
| 3457824                | TIMELESS    | NM_003920    | 12q12-q13         | 4.31E-06                  | 1.21E-02        | 1.740                    |
| 2334052                | C1orf228    | NM_001145636 | 1p34.1            | 4.34E-06                  | 1.48E-01        | 1.240                    |
| 3798829                | FAM38B      | NM_022068    | 18p11.22          | 4.60E-06                  | 1.77E-04        | 8.156                    |
| 3724591                | C17orf57    | NM_152347    | 17q21.32          | 4.66E-06                  | 9.37E-02        | -2.163                   |
| 2400793                | HSPG2       | NM_005529    | 1p36.1-p34        | 4.72E-06                  | 3.87E-01        | 1.064                    |
| 2841491                | C5orf41     | NM_153607    | 5q35.1            | 4.76E-06                  | 3.09E-01        | 1.167                    |
| 3066297                | SRPK2       | NM_182691    | 7q22-q31.1        | 5.13E-06                  | 8.92E-01        | 1.016                    |

**Supplementary Table 4 (con't). Alternatively Spliced Transcripts in CML Compared to Normal Stem Cells**

| Transcript Cluster ID* | Gene Symbol | RefSeq ID    | Genomic Location† | P (Alternative Splicing)‡ | P (Expression)§ | Fold Change (Expression) |
|------------------------|-------------|--------------|-------------------|---------------------------|-----------------|--------------------------|
| 3778504                | RAB31       | NM_006868    | 18p11.3           | 5.23E-06                  | 2.86E-04        | 4.647                    |
| 2582124                | NR4A2       | NM_006186    | 2q22-q23          | 5.25E-06                  | 7.91E-03        | -2.797                   |
| 2778440                | UNC5C       | NM_003728    | 4q21-q23          | 5.29E-06                  | 1.08E-02        | 1.285                    |
| 2408041                | HPCAL4      | NM_016257    | 1p34.2            | 5.54E-06                  | 2.07E-02        | -1.692                   |
| 2580802                | RND3        | NM_005168    | 2q23.3            | 5.73E-06                  | 1.31E-03        | -2.296                   |
| 2363902                | DUSP12      | NM_007240    | 1q21-q22          | 5.99E-06                  | 1.04E-02        | 1.368                    |
| 3807261                | SMAD7       | NM_005904    | 18q21.1           | 6.20E-06                  | 1.84E-02        | -1.678                   |
| 3473436                | TESC        | NR_031766    | 12q24.22          | 6.38E-06                  | 1.27E-02        | 1.737                    |
| 2521574                | PLCL1       | NM_006226    | 2q33              | 6.57E-06                  | 4.18E-04        | -3.670                   |
| 3633403                | SIN3A       | NM_015477    | 15q24.2           | 6.76E-06                  | 8.87E-01        | 1.015                    |
| 3417249                | ERBB3       | NM_001982    | 12q13             | 6.86E-06                  | 8.74E-01        | -1.012                   |
| 3914021                | GMEB2       | NM_012384    | 20q13.33          | 7.13E-06                  | 2.19E-01        | -1.159                   |
| 2509988                | LYPD6B      | NM_177964    | 2q23.2            | 7.47E-06                  | 4.01E-03        | -1.665                   |
| 2522247                | AOX1        | NM_001159    | 2q33              | 7.52E-06                  | 8.10E-03        | -1.507                   |
| 2473936                | KCNK3       | NM_002246    | 2p23              | 9.46E-06                  | 1.86E-02        | -1.201                   |
| 3485292                | NBEA        | NM_015678    | 13q13             | 9.66E-06                  | 4.37E-04        | -1.938                   |
| 2358426                | ADAMTSL4    | AK023606     | 1q21.3            | 9.87E-06                  | 4.14E-02        | -1.700                   |
| 3352948                | SORL1       | NM_003105    | 11q23.2-q24.2     | 9.89E-06                  | 9.59E-04        | -2.154                   |
| 3577683                | SERPINA9    | NM_175739    | 14q32.13          | 1.06E-05                  | 6.35E-01        | 1.059                    |
| 3772158                | TK1         | NM_003258    | 17q23.2-q25.3     | 1.07E-05                  | 1.30E-04        | 1.343                    |
| 2364016                | NOS1AP      | NM_014697    | 1q23.3            | 1.09E-05                  | 8.06E-01        | 1.021                    |
| 3887302                | CD40        | NM_001250    | 20q12-q13.2       | 1.10E-05                  | 1.76E-02        | -1.522                   |
| 3881391                | ID1         | NM_181353    | 20q11             | 1.13E-05                  | 1.57E-03        | -2.084                   |
| 3504526                | LATS2       | NM_014572    | 13q11-q12         | 1.14E-05                  | 9.21E-03        | -1.298                   |
| 3815233                | ELANE       | NM_001972    | 19p13.3           | 1.16E-05                  | 4.96E-03        | -1.421                   |
| 2623515                | ALAS1       | NM_000688    | 3p21.1            | 1.16E-05                  | 3.65E-02        | 1.447                    |
| 2976360                | PERP        | NM_022121    | 6q24              | 1.17E-05                  | 1.85E-03        | -3.289                   |
| 3536434                | SAMD4A      | NM_015589    | 14q22.2           | 1.18E-05                  | 1.24E-01        | -1.167                   |
| 3716151                | ANKRD13B    | NM_152345    | 17q11.2           | 1.20E-05                  | 1.23E-01        | 1.194                    |
| 3772279                | SOCS3       | NM_003955    | 17q25.3           | 1.36E-05                  | 6.52E-04        | -1.765                   |
| 3228373                | TSC1        | NM_000368    | 9q34              | 1.40E-05                  | 2.02E-01        | 1.159                    |
| 2601287                | AP1S3       | NM_001039569 | 2q36.1            | 1.46E-05                  | 2.56E-04        | 1.495                    |
| 2652801                | NLGN1       | NM_014932    | 3q26.31           | 1.55E-05                  | 6.71E-03        | -2.651                   |
| 2905469                | RNF8        | NM_003958    | 6p21.3            | 1.59E-05                  | 1.36E-02        | 1.464                    |
| 2395890                | CLSTN1      | NM_001009566 | 1p36.22           | 1.60E-05                  | 5.37E-01        | -1.040                   |
| 3754227                | MYO19       | NM_001163735 | 17q12             | 1.61E-05                  | 1.61E-02        | 1.305                    |
| 3261492                | NOLC1       | NM_004741    | 10q24.32          | 1.64E-05                  | 1.49E-01        | 1.305                    |
| 4027176                | FLNA        | NM_001456    | Xq28              | 1.73E-05                  | 3.71E-01        | -1.080                   |
| 3319937                | WEE1        | NM_003390    | 11p15.3-p15.1     | 1.76E-05                  | 3.38E-03        | 1.504                    |
| 3517251                | DACH1       | NM_080759    | 13q22             | 1.76E-05                  | 4.75E-03        | -2.013                   |
| 3545130                | VASH1       | NM_014909    | 14q24.3           | 1.81E-05                  | 1.26E-01        | -1.216                   |
| 3859761                | DMKN        | NM_001126056 | 19q13.12          | 1.85E-05                  | 1.93E-02        | -1.361                   |
| 3144934                | GEM         | NM_005261    | 8q13-q21          | 1.86E-05                  | 6.15E-04        | -2.653                   |
| 3895118                | CPXM1       | NM_019609    | 20p13-p12.3       | 1.93E-05                  | 2.72E-03        | 1.632                    |
| 2931391                | MTHFD1L     | NM_015440    | 6q25.1            | 1.99E-05                  | 4.74E-01        | -1.105                   |
| 3449068                | TMTC1       | NM_001193451 | 12p11.22          | 2.22E-05                  | 4.60E-02        | -1.695                   |
| 3815649                | CIRBP       | NR_023312    | 19p13.3           | 2.24E-05                  | 1.07E-01        | -1.192                   |
| 2332812                | ERMAP       | NM_001017922 | 1p34.2            | 2.38E-05                  | 1.05E-02        | 1.205                    |
| 4017798                | KCNE1L      | NM_012282    | Xq22.3            | 2.49E-05                  | 1.60E-02        | -1.258                   |
| 2475209                | PPP1CB      | NM_002709    | 2p23              | 2.66E-05                  | 1.21E-03        | -1.509                   |
| 3868753                | KLK5        | NM_012427    | 19q13.33          | 2.72E-05                  | 3.23E-01        | 1.051                    |
| 2665720                | ZNF385D     | NM_024697    | 3p24.3            | 2.95E-05                  | 6.44E-02        | -2.627                   |
| 3703885                | SLC7A5      | NM_003486    | 16q24.3           | 3.03E-05                  | 3.59E-02        | -1.830                   |
| 2650199                | SMC4        | NM_005496    | 3q26.1            | 3.04E-05                  | 1.52E-02        | 1.416                    |
| 2891341                | IRF4        | NM_002460    | 6p25-p23          | 3.22E-05                  | 1.70E-02        | -1.634                   |
| 2633691                | TMEM45A     | NM_018004    | 3q12.2            | 3.34E-05                  | 4.43E-03        | 1.947                    |
| 2832052                | HARS2       | NM_012208    | 5q31.3            | 3.44E-05                  | 7.13E-04        | 1.549                    |
| 2316953                | PRDM16      | NM_022114    | 1p36.23-p33       | 3.49E-05                  | 9.98E-03        | -1.491                   |

**Supplementary Table 4 (con't). Alternatively Spliced Transcripts in CML Compared to Normal Stem Cells**

| Transcript Cluster ID* | Gene Symbol | RefSeq ID    | Genomic Location† | P (Alternative Splicing)‡ | P (Expression)§ | Fold Change (Expression) |
|------------------------|-------------|--------------|-------------------|---------------------------|-----------------|--------------------------|
| 3254337                | C10orf57    | NM_025125    | 10q22.3           | 3.52E-05                  | 1.01E-01        | 1.592                    |
| 3888613                | CEBPB       | NM_005194    | 20q13.1           | 3.53E-05                  | 2.88E-01        | -1.105                   |
| 3904119                | CPNE1       | NM_152930    | 20q11.22          | 3.57E-05                  | 5.58E-01        | 1.060                    |
| 3932131                | PSMG1       | NM_003720    | 21q22.3           | 3.72E-05                  | 4.17E-03        | 1.792                    |
| 2548617                | CDC42EP3    | NM_006449    | 2p21              | 3.76E-05                  | 9.88E-02        | 1.373                    |
| 2796510                | MLF1IP      | NM_024629    | 4q35.1            | 3.88E-05                  | 2.29E-02        | 2.400                    |
| 3779579                | TUBB6       | NM_032525    | 18p11.21          | 3.89E-05                  | 1.24E-02        | 1.603                    |
| 2484970                | EHBP1       | NM_015252    | 2p15              | 3.96E-05                  | 6.92E-02        | -1.361                   |
| 3226592                | WDR34       | NM_052844    | 9q34.11           | 3.98E-05                  | 1.28E-02        | 1.084                    |
| 3032647                | DPP6        | NM_001039350 | 7q36.2            | 4.27E-05                  | 3.08E-01        | -1.109                   |
| 2502762                | STEAP3      | NM_182915    | 2q14.2            | 4.47E-05                  | 8.73E-02        | 1.273                    |
| 2644014                | PCCB        | NM_001178014 | 3q21-q22          | 4.62E-05                  | 2.73E-02        | 1.312                    |
| 2725061                | LIMCH1      | NM_014988    | 4p13              | 5.26E-05                  | 8.59E-03        | -1.880                   |
| 3775842                | TYMS        | NM_001071    | 18p11.32          | 5.42E-05                  | 5.90E-03        | 2.090                    |
| 3693788                | SLC38A7     | NM_018231    | 16q21             | 5.53E-05                  | 4.96E-01        | 1.049                    |
| 7385641                | CLSTN2      | NM_022131    | 3q23              | 5.60E-05                  | 3.09E-01        | -1.111                   |
| 3877221                | C20orf7     | NR_029377    | 20p12.1           | 5.70E-05                  | 2.85E-02        | 1.348                    |
| 2646125                | CHST2       | NM_004267    | 3q24              | 6.02E-05                  | 8.06E-01        | -1.015                   |
| 2878273                | HBEGF       | NM_001945    | 5q23              | 6.11E-05                  | 3.38E-02        | -1.389                   |
| 3833992                | CYP2S1      | NM_030622    | 19q13.1           | 6.22E-05                  | 3.67E-02        | 1.221                    |
| 3897505                | JAG1        | NM_000214    | 20p12.1-p11.23    | 6.62E-05                  | 6.18E-05        | -1.904                   |
| 3438061                | GPR133      | NM_198827    | 12q24.33          | 6.68E-05                  | 7.06E-01        | 1.035                    |
| 2475678                | LBH         | NM_030915    | 2p23.1            | 7.04E-05                  | 1.46E-02        | -1.680                   |
| 3241601                | C10orf68    | NM_024688    | 10p11.22          | 7.13E-05                  | 7.00E-02        | -1.394                   |
| 3839718                | CD33        | NM_001772    | 19q13.3           | 7.45E-05                  | 1.43E-03        | 1.796                    |
| 3267382                | INPP5F      | NM_014937    | 10q26.11          | 7.67E-05                  | 9.67E-01        | -1.003                   |
| 3675285                | WDR24       | NM_032259    | 16p13.3           | 7.85E-05                  | 9.93E-01        | -1.001                   |
| 3257098                | FAS         | NM_000043    | 10q24.1           | 7.85E-05                  | 2.19E-02        | 1.983                    |
| 3836432                | QPCTL       | NM_017659    | 19q13.32          | 7.87E-05                  | 8.78E-01        | 1.009                    |
| 2346074                | ZNF326      | NM_182976    | 1p22.2            | 7.87E-05                  | 3.51E-01        | 1.130                    |
| 3027808                | AGK         | NM_018238    | 7q34              | 8.02E-05                  | 8.05E-01        | -1.039                   |
| 3932148                | BRWD1       | NM_033656    | 21q22.2           | 8.26E-05                  | 1.95E-01        | -1.136                   |
| 3922793                | PDE9A       | NM_002606    | 21q22.3           | 8.36E-05                  | 1.62E-02        | 1.255                    |
| 2735027                | SPP1        | NM_001040058 | 4q22.1            | 9.08E-05                  | 2.14E-02        | -3.203                   |
| 3127978                | NKX3-1      | NM_006167    | 8p21              | 9.11E-05                  | 2.62E-02        | -1.377                   |
| 3424174                | MYF5        | NM_005593    | 12q21             | 9.41E-05                  | 5.98E-01        | 1.063                    |
| 2883878                | EBF1        | NM_024007    | 5q34              | 9.60E-05                  | 1.05E-03        | 2.282                    |
| 3129065                | CLU         | NM_001831    | 8p21-p12          | 9.65E-05                  | 1.58E-02        | -1.705                   |
| 3482572                | WASF3       | NM_006646    | 13q12             | 9.66E-05                  | 2.43E-02        | -1.990                   |
| 2571457                | CKAP2L      | NM_152515    | 2q13              | 9.86E-05                  | 1.99E-02        | 1.648                    |
| 2893895                | BMP6        | NM_001718    | 6p24-p23          | 1.01E-04                  | 4.68E-02        | -2.824                   |
| 2602304                | TM4SF20     | NM_024795    | 2q36.3            | 1.02E-04                  | 6.69E-01        | -1.063                   |
| 2577856                | LCT         | NM_002299    | 2q21              | 1.04E-04                  | 1.05E-01        | 1.219                    |
| 2882196                | ATOX1       | NM_004045    | 5q32              | 1.04E-04                  | 1.30E-03        | 1.613                    |
| 2676927                | SELK        | NM_021237    | 3p21.31           | 1.10E-04                  | 1.71E-01        | -1.137                   |
| 3188111                | PTGS1       | NM_000962    | 9q32-q33.3        | 1.11E-04                  | 1.17E-02        | -2.468                   |
| 2496727                | MAP4K4      | NM_145686    | 2q11.2-q12        | 1.12E-04                  | 1.97E-02        | 1.529                    |
| 3669059                | GABARAPL2   | NM_007285    | 16q22.1           | 1.12E-04                  | 1.63E-02        | -1.534                   |
| 2544201                | TP53I3      | NM_004881    | 2p23.3            | 1.13E-04                  | 5.94E-04        | 1.414                    |
| 3219215                | KLF4        | NM_004235    | 9q31              | 1.14E-04                  | 9.00E-04        | -1.730                   |
| 2577958                | DARS        | NM_001349    | 2q21.3            | 1.16E-04                  | 9.95E-01        | -1.001                   |
| 3715874                | ERAL1       | NM_005702    | 17q11.2           | 1.16E-04                  | 4.16E-04        | 1.626                    |
| 3359529                | CARS        | NR_036542    | 11p15.5           | 1.17E-04                  | 2.15E-01        | 1.222                    |
| 2925841                | ARG1        | NM_000045    | 6q23              | 1.18E-04                  | 5.03E-01        | -1.080                   |
| 4017381                | TSC22D3     | NM_198057    | Xq22.3            | 1.19E-04                  | 4.07E-02        | -1.672                   |
| 3645947                | CLUAP1      | NM_015041    | 16p13.3           | 1.19E-04                  | 2.39E-02        | 1.702                    |
| 3236958                | VIM         | NM_003380    | 10p13             | 1.20E-04                  | 1.78E-01        | -1.164                   |
| 2474977                | FOSL2       | NM_005253    | 2p23.3            | 1.20E-04                  | 3.80E-03        | -2.081                   |

**Supplementary Table 4 (con't). Alternatively Spliced Transcripts in CML Compared to Normal Stem Cells**

| Transcript Cluster ID* | Gene Symbol | RefSeq ID | Genomic Location† | P (Alternative Splicing)‡ | P (Expression)§ | Fold Change (Expression) |
|------------------------|-------------|-----------|-------------------|---------------------------|-----------------|--------------------------|
| 2359885                | SLC27A3     | NM_024330 | 1q21.3            | 1.25E-04                  | 4.76E-03        | 1.289                    |
| 2656971                | RTP1        | NM_153708 | 3q27.3            | 1.28E-04                  | 6.73E-01        | 1.052                    |
| 2341083                | GADD45A     | NM_001924 | 1p31.2            | 1.28E-04                  | 4.40E-03        | -1.613                   |
| 3453837                | TUBA1A      | NM_006009 | 12q13.12          | 1.29E-04                  | 2.31E-02        | -1.402                   |

Genes with alternative transcript p-value < 0.01 are represented in the table. All calculations were made between CML stem and normal stem cell populations from five CML or normal marrow donors from log2 transformed, default RMA background corrected array intensities.

\*From Human Exon 1.0 ST whole genome gene expression microarrays (Affymetrix, Santa Clara, CA).

†Genomic coordinates refer to the human reference genome hg19 (GRCh37).

‡Alternative splicing p-value resulting from ANOVA analysis of exon-level microarray data.

§Expression p-value resulting from ANOVA analysis of gene-level microarray data.

|| Positive values indicate upregulation of the upstream regulator in CML stem populations, and negative values indicate downregulation in CML stem cells compared to normal.
